# Supplementary material
Source: HighWire-hosted journal article supplement (https://www.cmajopen.ca/content/suppl/2020/04/23/8.2.E297)
Supplement: 2019-0231-original-submission.pdf [file 2019-0231-original-submission.pdf]

## Characteristics of high drug cost beneficiaries across Canada: A pan-Canadian Analysis

Mina Tadrous, PharmD, PhD<sup>1,2</sup>; Diana Martins, MSc<sup>3</sup>; Muhammad M. Mamdani, PharmD, MA, MPH<sup>2,4-6</sup>;  
Tara Gomes, MHSc, PhD<sup>2,3,4</sup>

1. Women's College Hospital Research Institute, Toronto
2. Leslie Dan Faculty of Pharmacy, University of Toronto, Toronto
3. Li Ka Shing Knowledge Institute, St. Michael's Hospital, Toronto
4. Institute of Health Policy, Management and Evaluation, University of Toronto, Toronto
5. Li Ka Shing Centre for Healthcare Analytics Research and Training, St. Michael's Hospital, Toronto
6. Department of Medicine, Faculty of Medicine, University of Toronto, Toronto

**Short Title:** High drug-cost beneficiaries across Canada

**Corresponding Author:**

Mina Tadrous  
76 Grenville St.  
Toronto, Ontario  
[mina.tadrous@wchospital.ca](mailto:mina.tadrous@wchospital.ca)  
Phone: 416-323-6400

**Total Word Count:** 2,451

**Keywords (MeSH):** Canada; Drug costs; Prescription drug/economics; Health Reform; Insurance Coverage; Insurance; Pharmaceuticals

**Abstract:*****BACKGROUND:***

Drugs are the fastest growing cost in the Canadian healthcare system, due to the increased number of high-cost drugs. The objective of this study was to examine the characteristics of high drug-cost beneficiaries across Canada relative to non-high drug-cost beneficiaries.

***METHODS:***

We conducted a cross-sectional study among public drug-plan beneficiaries residing in 9 provinces. We stratified the cohort into 2 groups: high drug-cost beneficiaries (top 5% of beneficiaries based on annual-costs) and other beneficiaries (remaining 95%). For each group we reported total drug-costs, prevalence of high-cost claims, median number of drugs, proportion of beneficiaries aged 65 and over, and the top 10 most costly and reimbursed medications. We reported estimates overall for all provinces (excluding Quebec and Territories) and by province.

***RESULTS:***

In FY 2016 high drug-cost beneficiaries accounted for nearly half of annual spending (46.5%), with an average annual spend of \$14,610 per beneficiary as compared to \$1,570 among non-high drug-cost beneficiaries. The median number of drugs dispensed was higher among high drug-cost beneficiaries (13 (IQR 7-19) vs. 5 (IQR 3-9)) and a larger proportion of high drug-cost beneficiaries received at least 1 drug-claim costing above \$1,000 (40.9% vs. 0.6%). Chronic medications were the most utilized medications for both groups, while biologics and antivirals were the most costly medications for high drug-cost beneficiaries.

***INTERPRETATION:***

High drug-cost beneficiaries are characterized by the use of expensive medications and polypharmacy relative to non-high drug cost beneficiaries. Interventions and policies to help reduce spending need to consider both of these factors.

## BACKGROUND

Drug costs are the fastest growing major expenditure in the Canadian Healthcare system.<sup>1,2</sup> They account for 15.7% of all public healthcare spending, growing 4.2% annually, and outpacing both hospital and physician expenditures.<sup>2</sup> Initially the high rates of increasing drug costs were thought to have subsided with the genericization of previous blockbuster drugs,<sup>3</sup> however this recent return to growth in drug spending is concerning for public drug programs across the country.

The recent increased spending on drugs is likely associated with both an increase in overall drug utilization as well as a growing number of new therapies being approved with high prices.<sup>4</sup> These two factors can lead to a high level of clustering among public drug program beneficiaries, in which a small number of beneficiaries account for a high proportion of total spending. Although previous work has cited a high rate of clustering in total healthcare and drug expenditure across Canada, characteristics of these beneficiaries for drug spending nationally is unknown.<sup>1</sup> In 2018, a CIHI drug spending report found that beneficiaries across Canada with over \$10,000 spent annually on drugs represented only 2% of all beneficiaries, yet accounted for one-third of overall spending, with this proportion expected to grow.<sup>1</sup> In light of the ongoing discourse for a national pharmacare strategy, a better understanding of high drug-cost beneficiaries across Canada is important to inform current planning. The objective of this study was to examine the characteristics of high drug-cost beneficiaries across Canada relative to non-high drug-cost beneficiaries.

## METHODS

We conducted a cross-sectional study among active public drug plan beneficiaries residing in 9 provinces across Canada (all except Quebec), defined as individuals who had at least 1 prescription reimbursed by a provincial public drug program between April 1, 2016 and March 31, 2017 (Fiscal Year (FY) 2016). We used the Canadian Institute for Health Information's National Prescription Drug Utilization Information System (CIHI NPDUIS) to identify all drugs dispensed to public drug beneficiaries over the study period. CIHI NPDUIS captures all publicly funded drugs dispensed in the community, except for medications dispensed in an inpatient hospital setting. We excluded all claims for services that are reimbursed by the government for all Canadians (regardless of eligibility for public drug programs), which include vaccinations and professional pharmacy services. We also excluded all cancer treatments in our primary analysis to allow for comparability across Canada, since cancer treatments may be reimbursed

1  
2  
3 differently between provinces. In a sensitivity analysis, we replicated the findings to include these  
4 cancer agents.  
5  
6  
7

8 We identified the total number of active drug program beneficiaries and their associated annual cost to  
9 the public drug program in each of the 9 included provinces. We created an overall estimate by  
10 combining data from all 9 included provinces; importantly these 'overall' estimates do not include data  
11 from Quebec or the territories. We stratified the cohort into 2 groups: "high drug-cost beneficiaries (top  
12 5% of beneficiaries based on annual costs) and other beneficiaries (remaining 95%). In a secondary  
13 analysis, we explored a third group, defined as the top 1% of beneficiaries, to characterize "very high  
14 drug-cost beneficiaries". Cost was defined as the total amount paid by the public-payer, this does not  
15 include deductibles and out-of-pocket payments. For each cost group and province we reported the  
16 following: 1) total drug costs; 2) minimum cost threshold defined as the individual with the lowest total  
17 drug spend in each group; 3) prevalence of high-cost drug claims (defined as a claim reimbursed for a  
18 cost greater than \$1,000); 4) median number of unique drugs dispensed per person; 5) number of  
19 beneficiaries aged 65 and over; 6) top 10 most commonly reimbursed medications; and 7) top 10 most  
20 costly reimbursed medications. All provinces studied require that individuals provide a form of  
21 identification (generally a provincial health insurance card) at the time of their prescription being  
22 dispensed, which can be used to link individual-level prescription history. This protocol was approved by  
23 the Research Ethics Board of St. Michael's Hospital, Toronto.  
24  
25  
26  
27  
28  
29  
30  
31  
32  
33  
34  
35

## 36 RESULTS

### 37 Overall Estimates

38 The overall analysis of publicly funded beneficiaries in FY 2016 exhibited a high-level of clustering in  
39 spending (Table 1), with high drug-cost beneficiaries accounting for nearly half of total annual spending  
40 (46.5 %). The minimum spend (cost threshold) for high drug-cost beneficiaries was \$5,291, with an  
41 average annual spend of \$14,610 per beneficiary (Table 1). These findings remained consistent in the  
42 sensitivity analysis when cancer treatments were included (See Supplemental Tables). Overall, we found  
43 that the median number of drugs dispensed was higher among high drug-cost beneficiaries (13  
44 (interquartile range (IQR) 7-19)), compared to all other beneficiaries (5 (IQR 3-9)), and a much larger  
45 proportion of high drug-cost beneficiaries received at least 1 high-cost drug claim compared with other  
46 beneficiaries (40.9% vs. 0.6%; Table 2). Overall, high drug-cost beneficiaries were less likely to be over  
47 the age of 65 (48.2%) compared to all other beneficiaries (65.1%).  
48  
49  
50  
51  
52  
53  
54  
55  
56  
57  
58  
59  
60

### Provincial Comparisons

In FY 2016 high drug-cost beneficiaries accounted for a large proportion of spending in all provinces (**Table 1**), with high drug-cost beneficiaries accounting for close to half of total annual spending in each province (range: 40.8% (Nova Scotia) to 55.4% (Saskatchewan)). However, the minimum spend (cost threshold) varied considerably, ranging from \$2,282 in PEI to \$8,567 in Manitoba. Among these beneficiaries, the average annual drug cost per person also exhibited geographic variability, ranging from \$6,650 (PEI) to \$25,560 (Manitoba). These findings remained consistent in the sensitivity analysis when cancer treatments were included (**See Supplemental Tables**).

Across all provinces we found that the median number of drugs dispensed was higher among high drug-cost beneficiaries (range: 8 in British Columbia to 16 in Nova Scotia), compared to all other beneficiaries (range: 3 in Saskatchewan to 6 in Nova Scotia; **Table 2**). Importantly, the number of high drug-cost beneficiaries that received an expensive claim ranged widely across provinces, from a low of 4.8% in PEI to a high of 63.4% in Manitoba. Consistent with the overall analysis, high drug-cost beneficiaries were typically less likely to be elderly compared with other beneficiaries. Specifically, less than 50% of high drug-cost beneficiaries were over the age of 65 in 6 of the 9 provinces, with the exceptions being Ontario (54.9%), Alberta (66.0%) and Nova Scotia (81.5%).

### Secondary Analysis: Very high drug-cost beneficiaries (Top 1%)

The secondary analysis of very high drug-cost beneficiaries also accounted for a large proportion of spending in all provinces (**Table 3**), with these beneficiaries accounting for nearly one-quarter of total annual spending (23.3%) overall. The minimum spend (cost threshold) for the top 1% of beneficiaries was \$18,831 and had an average annual spend of \$36,553 per person. Clustering of costs among very high drug-cost beneficiaries was similar across all provinces (range: 21.0% (New Brunswick) to 29.2% (PEI) of total annual spending; **Table 3**). However, there was a wide range in the minimum spend (cost threshold) (range: from \$7,932 (PEI) to \$30,978 (Manitoba)) and average cost per person (range: from \$18,465 (PEI) to \$62,519 (Manitoba)) for these beneficiaries.

Among the very high drug-cost beneficiaries we found that the median number of drugs dispensed was slightly lower compared to high drug-cost beneficiaries in most provinces (range: from 6 (IQR 2-12) (PEI)

1  
2  
3 to 10 (IQR 6-15), whereas the majority of these beneficiaries received at least 1 high cost drug claim  
4 (range: from 73.5% (PEI) to 99.5% (Alberta)). Very high drug-cost beneficiaries were also younger than  
5 high drug-cost beneficiaries, with a lower proportion over the age of 65 (range: from 18.9% (British  
6 Columbia) to 52.7% (Nova Scotia)).  
7  
8  
9

### 10 11 Top 10 drugs by cost and utilization

12  
13 There were some differences in the patterns of drug spending between high cost groups overall (**Table**  
14 **4**). In terms of utilization, the most commonly reimbursed drugs were relatively similar across all groups  
15 of beneficiaries, with agents for common chronic conditions (e.g. inhalers, statins and antibiotics) being  
16 the most commonly used treatments. The one exception was the high use of biologics among very high  
17 drug-cost beneficiaries, with 2 biologics (infliximab (n=9,645) and adalimumab (n=6,549)) in the top 10  
18 most utilized medications in this beneficiary group. In contrast, the medications with the highest total  
19 spending varied between all three groups. Antivirals (e.g. those indicated to treat Hepatitis C and HIV)  
20 and biologics were the highest cost treatments among the very high drug-cost beneficiaries. Among high  
21 drug-cost beneficiaries, there was still high spending on biologics in addition to insulin, antipsychotics  
22 and hydromorphone. These trends were similar across provinces (**See Supplemental material**).  
23  
24  
25  
26  
27  
28  
29  
30 Importantly, 7 of the 9 provinces had a biologic as the highest cost among high drug-cost beneficiaries.  
31  
32

### 33 **INTERPRETATION**

34  
35 Our study found that a minority of beneficiaries accounted for a substantial proportion of public drug  
36 spending in nine provinces across Canada, with the costs incurred by high drug-cost beneficiaries  
37 representing close to half of public drug programs' annual spending. Yet, the characteristics and  
38 medication use patterns of high drug-cost beneficiaries are variable. In fact, there appears to be  
39 evidence of two factors contributing to the clustering of high drug-cost beneficiaries: 1) patients  
40 receiving expensive medications, such as biologics and hepatitis C treatments, and 2) complex patients  
41 with a high comorbidity burden who are receiving a greater number of medications. Addressing both of  
42 these issues will be important in the effort to develop robust and sustainable public drug programs.  
43  
44  
45  
46  
47  
48  
49

50 Our study highlights the importance of developing strategies that address the impact of rising costs of  
51 new and expensive medications<sup>5,6</sup> and aligns with recent evidence demonstrating the growing impact of  
52 high-cost agents on public spending.<sup>7</sup> The increase in spending is attributable, in part, to both high use  
53 of costly treatments available under public drug programs as well as frequent utilization of multiple  
54  
55  
56  
57  
58  
59  
60

1  
2  
3 medications for common chronic conditions. These results align with observations from other public and  
4 private payers, in Canada and other jurisdictions.<sup>8-11</sup> Our study is the first to explore this issue across 9  
5 provinces giving a more national scope to problem. There is also strong evidence that the price of new  
6 market entry drugs has been outpacing the consumer price index over the past two decades, and the  
7 number of drugs with high cost has dramatically increased over time.<sup>7</sup> For example, the annual number  
8 of approved drugs with costs over \$10,000 increased from 20 drugs in 2005 to 124 drugs in 2015.<sup>4</sup> These  
9 high prices have likely contributed to the degree of clustering of public drug spending among  
10 beneficiaries observed in our study. The patterns we observed are also anticipated to grow due to the  
11 increasing availability of expensive medications, which raises concerns of the expansion and  
12 sustainability of provincial public drug programs. Moreover, there is evidence to suggest that public payers  
13 are inheriting privately-insured patients receiving high-cost agents due to a process that allows private  
14 payers to leverage publicly funded catastrophic drug programs.<sup>12,13</sup> As private payers are faced with a  
15 larger number of claims for high-cost agents, they may be looking to shift the risk to public payers and  
16 reduce the impact of these agents on their premiums.<sup>12</sup> This dynamic should be monitored closely as it  
17 may have a growing impact on public drug spending.  
18  
19  
20  
21  
22  
23  
24  
25  
26  
27  
28  
29

30 This study comes at a critical time as the federal government in Canada explores the potential for a  
31 broader universal pharmacare strategy and the potential development of a national formulary and drug  
32 agency.<sup>14</sup> Considering drivers of high drug-cost beneficiaries in a pharmacare strategy would allow for  
33 broader negotiations on a pan-Canadian level, which in turn could result in price listing agreements that  
34 are proven to incur cost-savings.<sup>15,16</sup> Additionally, policymakers should consider this opportunity to  
35 develop pan-Canadian strategies that explore other mechanisms to address high drug costs. This may  
36 include preferential listing of biosimilars (in place of biologics) and ongoing formulary modernization to  
37 ensure appropriate use of costly medications.<sup>17-19</sup>  
38  
39  
40  
41  
42  
43  
44

45 Our results also highlight that high drug-cost beneficiaries used more medications on average compared  
46 to other beneficiaries, highlighting the complexity of conditions among these patients. Approaches to  
47 address the high costs among complex patients who are receiving a large number of chronic  
48 medications requires interventional approaches beyond pricing policies.<sup>18</sup> One potential approach that  
49 this population could benefit from is the implementation of drug-specific case management strategies.  
50 Case-management strategies have been used by a number of payers, mostly in the United States, to  
51 address spending for high drug-cost beneficiaries.<sup>20-23</sup> An important characteristic of successful  
52  
53  
54  
55  
56  
57  
58  
59  
60

1  
2  
3 strategies has been the adoption of segmented and targeted approaches.<sup>10</sup> For example, among  
4 patients using a large number of chronic medications, there are previously noted differences between  
5 younger and older patients.<sup>10,24</sup> Specifically, medications indicated for mental health diagnoses have  
6 been found to be a major cost-driver among younger high drug-cost beneficiaries, while among older  
7 high drug-cost beneficiaries, management of chronic diseases such as COPD and diabetes are more likely  
8 to influence costs.<sup>10,23,24</sup> These approaches may also help to assess potential overprescribing that has  
9 been cited in complex populations.<sup>25</sup> Development of disease case-management strategies should help  
10 account for these differences when developing policies.  
11  
12  
13  
14  
15  
16  
17

18 Our study is not without limitations. First, only beneficiaries who had at least one drug claim paid by a  
19 public drug program in a given year were included in this study since we do not have data in all  
20 provinces on public drug program eligibility. Therefore, this study did not include beneficiaries who are  
21 eligible for public drug benefits but who did not receive a medication over the study period, nor did it  
22 include people whose claims were accepted (e.g. to be applied toward a deductible), but not paid for by  
23 public drug programs. It is likely that if these individuals were included, the differences in minimum cost  
24 thresholds between high drug-cost beneficiaries and all other beneficiaries would be even more  
25 pronounced. Second, we do not have information on private insurance status and it is possible that  
26 individuals may have received other medications that were not captured in our study, particularly  
27 among those who utilized the catastrophic drug programs. Lastly, much of the information on drug  
28 pricing is based on the total amount paid to pharmacies. This information does not account for actual  
29 prices paid by public payers based on confidential listing agreements with manufacturers, and thus the  
30 costs reported in some drug classes may overestimate the true public program costs.  
31  
32  
33  
34  
35  
36  
37  
38  
39  
40

41 The results of this study elucidate clustering of public-drug spending among a small proportion of high  
42 drug-cost beneficiaries. This work can be used to inform policies specific to this population that can help  
43 curb rising costs and optimize medication use. Future work should explore interventions to address  
44 growing drug costs in this population, accounting for the two separate concerns depicted in our study.  
45 This includes targeted approaches addressing the use a costly medications as well as the use of a large  
46 number of medications. Future analysis should further refine these populations and explore their  
47 characteristics separately as potential interventions and policies to help reduce spending among these  
48 populations would differ.  
49  
50  
51  
52  
53  
54  
55  
56  
57  
58  
59  
60

## ACKNOWLEDGMENTS AND FUNDING SOURCES

*Parts of this material are based on data and information compiled and provided by CIHI. This study was funded by a grant from the Ontario Ministry of Health and Long-Term Care (MOHLTC) Health System Research Fund. The opinions, results and conclusions reported in this article are those of the authors and are independent from the funding sources. No endorsement by CIHI or the Ontario MOHLTC is intended or should be inferred.*

*All authors were involved in the design, interpretation of results, writing, conceptualization of recommendations, and revision of the manuscript (MT, DM, MMM, TG). MT and TG, were involved in the implementation of the study. MT is the guarantor of the content of the manuscript.*

## DISCLOSURES

*Dr Muhammad Mamdani has received honoraria from Boehringer Ingelheim, Pfizer, Bristol-Myers Squibb, and Bayer. No other authors have any conflicts of interest to declare.*

Confidential

## REFERENCES

1. CIHI. Prescribed drug spending in Canada, 2018. 2018.
2. Information ClfH. *National Health Expenditure Trends, 1975-2018*. Canadian Institute for Health Information; 2018.
3. Harrison C. Dangling from the patent cliff. *Nature Reviews Drug Discovery*. 2013;12(1):14-16.
4. Patented Medicine Prices Review Board. Protecting Canadians from Excessive Drug Prices: Consulting on Proposed Amendments to the Patented Medicines Regulations. 2016.
5. Morgan SG, Li W, Yau B, Persaud N. Estimated effects of adding universal public coverage of an essential medicines list to existing public drug plans in Canada. *Canadian Medical Association Journal*. 2017;189(8):E295-E302.
6. Minhas R, Ng JCY, Tan J, et al. Should Developed Countries, Including Canada, Provide Universal Access to Essential Medications through a National, Publicly Funded and Administered Insurance Plan? *The Canadian journal of hospital pharmacy*. 2016;69(2).
7. Patented Medicine Prices Review Board. Private Drug Plans in Canada: High-Cost Drugs and Beneficiaries, 2005 to 2015. 2016.
8. Weymann D, Smolina K, Gladstone EJ, Morgan SG. High-Cost Users of Prescription Drugs: A Population-Based Analysis from British Columbia, Canada. *Health services research*. 2017;52(2):697-719.
9. Wodchis WP, Austin PC, Henry DA. A 3-year study of high-cost users of health care. *Canadian Medical Association Journal*. 2016;188(3):182-188.
10. Wammes JJG, van der Wees PJ, Tanke MAC, Westert GP, Jeurissen PPT. Systematic review of high-cost patients' characteristics and healthcare utilisation. *BMJ Open*. 2018;8(9):e023113.
11. Muratov S, Lee J, Holbrook A, et al. Regional variation in healthcare spending and mortality among senior high-cost healthcare users in Ontario, Canada: a retrospective matched cohort study. *BMC geriatrics*. 2018;18(1):262.
12. Charbonneau M, Gagnon M-A. Surviving niche busters: Main strategies employed by Canadian private insurers facing the arrival of high cost specialty drugs. *Health Policy*. 2018;122(12):1295-1301.
13. Tadrous M, Greaves S, Martins D, Mamdani MM, Juurlink DN, Gomes T. Catastrophic drug coverage: utilization insights from the Ontario Trillium Drug Program. *CMAJ open*. 2018;6(1):E132.
14. Pharmacare; FROtACotIoN. A Prescription for Canada: Achieving Pharmacare for All. 2019.
15. Morgan SG, Friesen MK, Thomson PA, Daw JR. Use of product listing agreements by Canadian provincial drug benefit plans. *Healthcare Policy*. 2013;8(4):45.
16. Ontario OotAGo. *Ontario Public Drug Programs*. 2017.
17. Kesselheim AS, Avorn J, Sarpatwari A. The high cost of prescription drugs in the united states: Origins and prospects for reform. *JAMA*. 2016;316(8):858-871.
18. Joynt KE, Figueroa JF, Beaulieu N, Wild RC, Orav EJ, Jha AK. Segmenting high-cost Medicare patients into potentially actionable cohorts. Paper presented at: Healthcare2017.
19. Flannery AH, Pandya K, Laine ME, Almeter PJ, Flynn JD. Managing the rising costs and high drug expenditures in critical care pharmacy practice. *Pharmacotherapy: The Journal of Human Pharmacology and Drug Therapy*. 2017;37(1):54-64.
20. Schore JL, Brown RS, Cheh VA. Case management for high-cost Medicare beneficiaries. *Health care financing review*. 1999;20(4):87.
21. Fireman B, Bartlett J, Selby J. Can disease management reduce health care costs by improving quality? *Health affairs*. 2004;23(6):63-75.

- 1
  - 2
  - 3
  - 4
  - 5
  - 6
  - 7
  - 8
  - 9
  - 10
  - 11
  - 12
  - 13
  - 14
  - 15
  - 16
  - 17
  - 18
  - 19
  - 20
  - 21
  - 22
  - 23
  - 24
  - 25
  - 26
  - 27
  - 28
  - 29
  - 30
  - 31
  - 32
  - 33
  - 34
  - 35
  - 36
  - 37
  - 38
  - 39
  - 40
  - 41
  - 42
  - 43
  - 44
  - 45
  - 46
  - 47
  - 48
  - 49
  - 50
  - 51
  - 52
  - 53
  - 54
  - 55
  - 56
  - 57
  - 58
  - 59
  - 60
22. Crowley JS, Ashner D, Elam L. *Medicaid outpatient prescription drug benefits: Findings from a national survey, 2003*. Henry J. Kaiser Family Foundation; 2003.
23. Swanson J, Weissert WG. Case Managers for High-Risk, High-Cost Patients as Agents and Street-Level Bureaucrats. *Medical Care Research and Review*. 2017;75(5):527-561.
24. de Oliveira C, Cheng J, Vigod S, Rehm J, Kurdyak P. Patients with high mental health costs incur over 30 percent more costs than other high-cost patients. *Health Affairs*. 2016;35(1):36-43.
25. Fried TR, O'leary J, Towle V, Goldstein MK, Trentalange M, Martin DK. Health outcomes associated with polypharmacy in community-dwelling older adults: A systematic review. *Journal of the American Geriatrics Society*. 2014;62(12):2261-2272.

Confidential

1  
2  
3  
4  
5  
6  
7  
8  
9  
10  
11  
12  
13  
14  
15  
16  
17  
18  
19  
20  
21  
22  
23  
24  
25  
26  
27  
28  
29  
30  
31  
32  
33  
34  
35  
36  
37  
38  
39  
40  
41  
42  
43  
44  
45  
46  
47

TABLES AND FIGURES

**Table 1: Proportion of total program spending (TPS) and total program spending by high drug-cost beneficiaries (top 5%), fiscal year 2016**

| Province                         | Overall                |                              | High drug-cost beneficiaries |                                |                                           |                              |
|----------------------------------|------------------------|------------------------------|------------------------------|--------------------------------|-------------------------------------------|------------------------------|
|                                  | Total Program Spending | Average Cost per beneficiary | Total Program Spending       | Proportion of Program Spending | High Drug-cost Beneficiary Cost Threshold | Average Cost per beneficiary |
| <b>Overall</b>                   | <b>\$ 8,185.0</b>      | <b>\$ 1,570</b>              | <b>\$ 3,809.0</b>            | <b>46.5%</b>                   | <b>\$ 5,291</b>                           | <b>\$ 14,610</b>             |
| <b>British Columbia</b>          | \$ 1,087.2             | \$ 1,473                     | \$ 586.6                     | 54.0                           | \$ 5,319                                  | \$ 15,896                    |
| <b>Alberta</b>                   | \$ 773.3               | \$ 1,330                     | \$ 363.5                     | 47.0                           | \$ 3,791                                  | \$ 12,502                    |
| <b>Saskatchewan</b>              | \$ 316.7               | \$ 1,106                     | \$ 175.5                     | 55.4                           | \$ 3,940                                  | \$ 12,253                    |
| <b>Manitoba</b>                  | \$ 320.8               | \$ 2,347                     | \$ 174.7                     | 54.5                           | \$ 8,567                                  | \$ 25,560                    |
| <b>Ontario</b>                   | \$ 5,126.3             | \$ 1,673                     | \$ 2,242.6                   | 43.7                           | \$ 5,656                                  | \$ 14,640                    |
| <b>New Brunswick</b>             | \$ 210.9               | \$ 1,662                     | \$ 93.5                      | 44.3                           | \$ 5,408                                  | \$ 14,744                    |
| <b>Prince Edward Island</b>      | \$ 26.0                | \$ 632                       | \$ 13.7                      | 52.6                           | \$ 2,282                                  | \$ 6,650                     |
| <b>Nova Scotia</b>               | \$ 187.0               | \$ 1,369                     | \$ 76.3                      | 40.8                           | \$ 4,065                                  | \$ 11,175                    |
| <b>Newfoundland and Labrador</b> | \$ 136.8               | \$ 1,326                     | \$ 56.0                      | 41.0                           | \$ 4,397                                  | \$ 10,863                    |

**Table 2: Drug utilization by province and high drug-cost beneficiary group, fiscal year 2016**

| Jurisdiction                     | High drug-cost beneficiaries |                                       |                        | Other beneficiaries |                                       |                        |
|----------------------------------|------------------------------|---------------------------------------|------------------------|---------------------|---------------------------------------|------------------------|
|                                  | Number of drugs              | Beneficiaries with claim over \$1,000 | Beneficiaries aged 65+ | Number of drugs     | Beneficiaries with claim over \$1,000 | Beneficiaries aged 65+ |
|                                  | Median (IQR)                 | N (%)                                 | (%)                    | Median (IQR)        | N (%)                                 | (%)                    |
| <b>Overall</b>                   | <b>13 (7-19)</b>             | <b>40.9%</b>                          | <b>48.2%</b>           | <b>8 (4-13)</b>     | <b>0.6%</b>                           | <b>65.1%</b>           |
| <b>British Columbia</b>          | 8 (5-14)                     | 38.0%                                 | 26.1%                  | 4 (2-7)             | 0.6%                                  | 45.6%                  |
| <b>Alberta</b>                   | 13 (8-18)                    | 38.4%                                 | 66.0%                  | 6 (3-9)             | 0.3%                                  | 81.2%                  |
| <b>Saskatchewan</b>              | 12 (7-18)                    | 22.1%                                 | 39.3%                  | 3 (1-6)             | 0.1%                                  | 45.4%                  |
| <b>Manitoba</b>                  | 9 (5-15)                     | 63.4%                                 | 23.4%                  | 6 (3-10)            | 1.0%                                  | 40.5%                  |
| <b>Ontario</b>                   | 14 (8-19)                    | 44.4%                                 | 54.9%                  | 6 (3-10)            | 0.7%                                  | 71.5%                  |
| <b>New Brunswick</b>             | 11 (6-17)                    | 37.2%                                 | 34.6%                  | 6 (3-10)            | 0.6%                                  | 63.4%                  |
| <b>Prince Edward Island</b>      | 12 (8-16)                    | 4.8%                                  | 41.7%                  | 4 (2-6)             | 0.0%                                  | 62.3%                  |
| <b>Nova Scotia</b>               | 16 (12-21)                   | 16.5%                                 | 81.5%                  | 6 (4-10)            | 0.2%                                  | 88.0%                  |
| <b>Newfoundland and Labrador</b> | 16 (9-22)                    | 15.3%                                 | 38.3%                  | 6 (3-10)            | 0.2%                                  | 50.3%                  |

IQR: Interquartile range

1  
2  
3  
4  
5  
6  
7  
8  
9  
10  
11  
12  
13  
14  
15  
16  
17  
18  
19  
20  
21  
22  
23  
24  
25  
26  
27  
28  
29  
30  
31  
32  
33  
34  
35  
36  
37  
38  
39  
40  
41  
42  
43  
44  
45  
46  
47

**Table 3: Secondary analysis of proportion of total program spending (TPS) and total program spending by very high drug-cost beneficiaries (top 1%), fiscal year 2016**

| Province                         | Overall                |                        | Very High Drug-cost Users (Top 1%) |                  |                  |
|----------------------------------|------------------------|------------------------|------------------------------------|------------------|------------------|
|                                  | Total Program Spending | Total Program Spending | Proportion of TPS                  | Cost Threshold   | Average Cost     |
| <b>Overall</b>                   | <b>\$ 8,185.0</b>      | <b>\$ 1,906.0</b>      | <b>23.3%</b>                       | <b>\$ 18,831</b> | <b>\$ 36,553</b> |
| <b>British Columbia</b>          | \$ 1,087.2             | \$ 297.8               | 27.4                               | \$ 19,890        | \$ 40,345        |
| <b>Alberta</b>                   | \$ 773.3               | \$ 189.3               | 24.5                               | \$ 19,590        | \$ 32,545        |
| <b>Saskatchewan</b>              | \$ 316.7               | \$ 89.7                | 28.3                               | \$ 17,888        | \$ 31,319        |
| <b>Manitoba</b>                  | \$ 320.8               | \$ 85.5                | 26.6                               | \$ 30,978        | \$ 62,520        |
| <b>Ontario</b>                   | \$ 5,126.3             | \$ 1,107.5             | 21.6                               | \$ 18,073        | \$ 36,144        |
| <b>New Brunswick</b>             | \$ 210.9               | \$ 44.2                | 21.0                               | \$ 20,442        | \$ 34,822        |
| <b>Prince Edward island</b>      | \$ 26.0                | \$ 7.6                 | 29.2                               | \$ 7,932         | \$ 18,465        |
| <b>Nova Scotia</b>               | \$ 187.0               | \$ 42.2                | 22.6                               | \$ 15,606        | \$ 30,882        |
| <b>Newfoundland and Labrador</b> | \$ 136.8               | \$ 29.1                | 21.3                               | \$ 13,386        | \$ 28,161        |

**Table 4: Top 10 chemicals by total drug program spending and Use by high cost category and by jurisdiction, fiscal year 2016**

| Very high drug-cost Beneficiaries (Top 1%) |                                                              | High drug-cost Beneficiaries (Top 5%) |                  | Other beneficiaries |                        |               |
|--------------------------------------------|--------------------------------------------------------------|---------------------------------------|------------------|---------------------|------------------------|---------------|
| <b>Total Spending</b>                      |                                                              |                                       |                  |                     |                        |               |
| <b>1</b>                                   | Infliximab*                                                  | \$ 331,002,170                        | Ranibizumab*     | \$ 149,319,608      | Salmeterol/Fluticasone | \$110,037,629 |
| <b>2</b>                                   | Sofosbuvir/ledipasvir <sup>#</sup>                           | \$ 270,669,622                        | Aflibercept      | \$ 122,412,063      | Atorvastatin           | \$108,457,147 |
| <b>3</b>                                   | Adalimumab*                                                  | \$ 145,652,072                        | Adalimumab*      | \$ 82,784,426       | Perindopril            | \$91,622,949  |
| <b>4</b>                                   | Lenalidomide                                                 | \$ 118,550,630                        | Paliperidone     | \$ 62,288,410       | Rosuvastatin           | \$86,933,263  |
| <b>5</b>                                   | Etanercept*                                                  | \$ 86,154,466                         | Etanercept       | \$ 50,613,266       | Metformin/Sitagliptin  | \$83,201,111  |
| <b>6</b>                                   | Sofosbuvir <sup>#</sup>                                      | \$ 74,950,373                         | Insulin glargine | \$ 38,740,800       | Sitagliptin            | \$76,710,532  |
| <b>7</b>                                   | Ranibizumab*                                                 | \$ 65,440,527                         | Infliximab*      | \$ 37,537,419       | Methadone              | \$76,477,878  |
| <b>8</b>                                   | Aflibercept                                                  | \$ 52,468,572                         | Hydromorphone    | \$ 36,425,150       | Rivaroxaban            | \$75,651,662  |
| <b>9</b>                                   | Eculizumab*                                                  | \$ 37,516,433                         | Aripiprazole     | \$ 34,064,003       | Insulin glargine       | \$74,519,810  |
| <b>10</b>                                  | Dasabuvir/Ombitasvir/<br>Paritaprevir/Ritonavir <sup>#</sup> | \$ 36,048,600                         | Methadone        | \$ 28,115,644       | Pantoprazole           | \$72,636,566  |
| <b>Total use</b>                           |                                                              |                                       |                  |                     |                        |               |
| <b>1</b>                                   | Pantoprazole                                                 | 10,090                                | Pantoprazole     | 10,090              | Rosuvastatin           | 10,090        |
| <b>2</b>                                   | Infliximab*                                                  | 9,645                                 | Salbutamol       | 9,645               | Atorvastatin           | 9,645         |
| <b>3</b>                                   | Salbutamol                                                   | 9,104                                 | Rosuvastatin     | 9,104               | Pantoprazole           | 9,104         |
| <b>4</b>                                   | Codeine/APAP                                                 | 7,524                                 | Atorvastatin     | 7,524               | Amoxicillin            | 7,524         |
| <b>5</b>                                   | Prednisone                                                   | 7,308                                 | Metformin        | 7,308               | Levothyroxine          | 7,308         |
| <b>6</b>                                   | Amoxicillin                                                  | 7,274                                 | Furosemide       | 7,274               | Salbutamol             | 7,274         |
| <b>7</b>                                   | Rosuvastatin                                                 | 7,072                                 | Amlodipine       | 7,072               | Amlodipine             | 7,072         |

1  
2  
3  
4  
5  
6  
7  
8  
9  
10  
11  
12  
13  
14  
15  
16  
17  
18  
19  
20  
21  
22  
23  
24  
25  
26  
27  
28  
29  
30  
31  
32  
33  
34  
35  
36  
37  
38  
39  
40  
41  
42  
43  
44  
45  
46  
47

|           |               |        |               |        |              |        |
|-----------|---------------|--------|---------------|--------|--------------|--------|
| <b>8</b>  | Adalimumab*   | 6,549  | Levothyroxine | 6,549  | Metformin    | 6,549  |
| <b>9</b>  | Methotrexate  | 6,277  | Amoxicillin   | 6,277  | Codeine/APAP | 6,277  |
| <b>10</b> | Levothyroxine | 6,228  | Codeine/APAP  | 6,228  | Ramipril     | 6,228  |
| <b>1</b>  | Pantoprazole  | 10,090 | Pantoprazole  | 10,090 | Rosuvastatin | 10,090 |

Note: \*Denotes a biologics (not including insulin or LMWH) and #denotes an antiviral.

Confidential

## Supplemental Material

**Table 1: Top 10 chemicals by total drug program spending by high cost category and by jurisdiction, fiscal year 2016**

Note: Biologics (not including insulin or LMWH) highlighted in Blue. Antivirals are highlighted in Yellow.

| Jurisdiction | Rank | Very high drug-cost Beneficiaries (Top 1%)  |                        | High drug-cost Beneficiaries (Top 5%) |                        | Other beneficiaries    |                        |
|--------------|------|---------------------------------------------|------------------------|---------------------------------------|------------------------|------------------------|------------------------|
|              |      | Drug Name                                   | Total program spending | Drug Name                             | Total program spending | Drug Name              | Total program spending |
| Alberta      | 1    | Infliximab                                  | \$ 64,867,932          | Adalimumab                            | \$ 15,203,734          | Salmeterol/Fluticasone | \$ 14,831,765          |
|              | 2    | Adalimumab                                  | \$ 22,541,668          | Glatiramer                            | \$ 8,771,051           | Atorvastatin           | \$ 12,238,077          |
|              | 3    | Sofosbuvir/Ledipasvir                       | \$ 18,438,149          | Ranibizumab                           | \$ 8,172,466           | Perindopril            | \$ 10,760,204          |
|              | 4    | Etanercept                                  | \$ 13,613,780          | Infliximab                            | \$ 7,673,371           | Pantoprazole           | \$ 10,565,809          |
|              | 5    | Fingolimod                                  | \$ 7,766,826           | Etanercept                            | \$ 7,322,786           | Formoterol/Budesonide  | \$ 10,260,184          |
|              | 6    | Dimethyl fumarate                           | \$ 5,239,637           | Insulin glargine                      | \$ 5,471,808           | Rivaroxaban            | \$ 9,512,546           |
|              | 7    | Eculizumab                                  | \$ 4,867,085           | Ustekinumab                           | \$ 5,318,795           | Rosuvastatin           | \$ 9,416,492           |
|              | 8    | Octreotide                                  | \$ 4,366,391           | Darbepoetin alfa                      | \$ 4,902,197           | Tiotropium             | \$ 8,710,675           |
|              | 9    | Interferon beta-1a                          | \$ 4,179,173           | Oxycodone                             | \$ 4,591,761           | Insulin glargine       | \$ 7,982,133           |
|              | 10   | Ustekinumab                                 | \$ 3,942,333           | Tinzaparin                            | \$ 3,725,097           | Amlodipine             | \$ 7,829,082           |
| BC           | 1    | Infliximab                                  | \$ 78,004,144          | Adalimumab                            | \$ 34,992,444          | Methadone              | \$ 18,223,015          |
|              | 2    | Sofosbuvir and ledipasvir                   | \$ 77,711,332          | Etanercept                            | \$ 21,280,993          | Nicotine               | \$ 14,368,720          |
|              | 3    | Adalimumab                                  | \$ 28,897,862          | Paliperidone                          | \$ 16,557,128          | Atorvastatin           | \$ 11,565,450          |
|              | 4    | Sofosbuvir                                  | \$ 19,268,081          | Infliximab                            | \$ 10,651,648          | Quetiapine             | \$ 10,465,102          |
|              | 5    | Dasabuvir/Ombitasvir/Paritaprevir/Ritonavir | \$ 16,854,455          | Clozapine                             | \$ 9,562,226           | Salmeterol/Fluticasone | \$ 10,347,632          |
|              | 6    | Alfa1 antitrypsin                           | \$ 7,253,536           | Methadone                             | \$ 8,171,709           | Ramipril               | \$ 8,085,614           |
|              | 7    | Fingolimod                                  | \$ 6,399,483           | Aripiprazole                          | \$ 8,065,912           | Gabapentin             | \$ 8,068,948           |
|              | 8    | Etanercept                                  | \$ 5,576,629           | Abatacept                             | \$ 6,409,482           | Insulin glargine       | \$ 8,062,263           |
|              | 9    | Dimethyl fumarate                           | \$ 4,405,563           | Quetiapine                            | \$ 5,525,898           | Aripiprazole           | \$ 7,965,701           |

|    |    |                                             |               |                         |               |                        |              |
|----|----|---------------------------------------------|---------------|-------------------------|---------------|------------------------|--------------|
|    | 10 | Ustekinumab                                 | \$ 3,355,662  | Golimumab               | \$ 5,238,164  | Amlodipine             | \$ 6,980,233 |
| 1  | 1  | Infliximab                                  | \$ 29,708,571 | Adalimumab              | \$ 12,666,070 | Salmeterol/Fluticasone | \$ 4,723,815 |
| 2  | 2  | Sofosbuvir/Ledipasvir                       | \$ 8,773,436  | Etanercept              | \$ 9,221,641  | Atorvastatin           | \$ 2,666,029 |
| 3  | 3  | Lenalidomide                                | \$ 7,827,696  | Infliximab              | \$ 6,328,948  | Aripiprazole           | \$ 2,323,571 |
| 4  | 4  | Adalimumab                                  | \$ 7,001,596  | Interferon beta-1a      | \$ 3,978,582  | Hydromorphone          | \$ 2,081,694 |
| 5  | 5  | Etanercept                                  | \$ 3,833,907  | Glatiramer acetate      | \$ 2,602,596  | Omeprazole             | \$ 2,041,208 |
| 6  | 6  | Sofosbuvir                                  | \$ 3,599,508  | Ustekinumab             | \$ 1,855,149  | Gabapentin             | \$ 1,991,915 |
| 7  | 7  | Alfa1 antitrypsin                           | \$ 2,590,337  | Tenofovir/Emtricitabine | \$ 1,820,047  | Methylphenidate        | \$ 1,832,170 |
| 8  | 8  | Octreotide                                  | \$ 1,662,581  | Dimethyl fumarate       | \$ 1,773,657  | Clozapine              | \$ 1,801,696 |
| 9  | 9  | Alglucosidase alfa                          | **            | Golimumab               | \$ 1,608,363  | Quetiapine             | \$ 1,767,142 |
| 10 | 10 | Dasabuvir/Ombitasvir/Paritaprevir/Ritonavir | \$ 1,168,231  | Darunavir               | \$ 1,602,081  | Risperidone            | \$ 1,696,644 |
| 11 | 1  | Infliximab                                  | \$ 7,614,736  | Ranibizumab             | \$ 2,881,004  | Salmeterol/Fluticasone | \$ 3,804,852 |
| 12 | 2  | Lenalidomide                                | \$ 4,805,559  | Methadone               | \$ 2,436,610  | Perindopril            | \$ 3,690,595 |
| 13 | 3  | Adalimumab                                  | \$ 3,539,920  | Aflibercept             | \$ 2,149,400  | Methadone              | \$ 3,597,739 |
| 14 | 4  | Etanercept                                  | \$ 2,086,924  | Adalimumab              | \$ 2,104,495  | Pantoprazole           | \$ 2,993,426 |
| 15 | 5  | Sofosbuvir/Ledipasvir                       | \$ 1,744,353  | Paliperidone            | \$ 2,103,991  | Atorvastatin           | \$ 2,416,560 |
| 16 | 6  | Ustekinumab                                 | \$ 1,180,724  | Hydromorphone           | \$ 1,336,460  | Nifedipine             | \$ 2,396,405 |
| 17 | 7  | Teriflunomide                               | \$ 1,123,646  | Risperidone             | \$ 1,264,379  | Rosuvastatin           | \$ 2,371,423 |
| 18 | 8  | Dimethyl fumarate                           | \$ 1,122,056  | Infliximab              | \$ 1,247,366  | Fluticasone            | \$ 2,134,415 |
| 19 | 9  | Interferon beta-1a                          | \$ 1,009,154  | Etanercept              | \$ 1,239,067  | Rivaroxaban            | \$ 1,893,174 |
| 20 | 10 | Ranibizumab                                 | \$ 843,777    | Clozapine               | \$ 975,819    | Perindopril/Diuretics  | \$ 1,808,922 |
| 21 | 1  | Infliximab                                  | \$ 4,245,402  | Methadone               | \$ 2,929,381  | Nifedipine             | \$ 2,640,961 |
| 22 | 2  | Lenalidomide                                | \$ 3,417,974  | Ranibizumab             | \$ 1,641,543  | Rosuvastatin           | \$ 2,294,220 |
| 23 | 3  | Adalimumab                                  | \$ 3,320,198  | Insulin (human)         | \$ 846,398    | Rabeprazole            | \$ 2,019,865 |
| 24 | 4  | Sofosbuvir/Ledipasvir                       | \$ 2,488,984  | Adalimumab              | \$ 833,129    | Fluticasone            | \$ 1,939,230 |
| 25 | 5  | Ustekinumab                                 | \$ 1,290,300  | Insulin (human)         | \$ 783,089    | Atorvastatin           | \$ 1,670,545 |
| 26 | 6  | Golimumab                                   | \$ 1,068,247  | Darbepoetin alfa        | \$ 599,397    | Methadone              | \$ 1,551,484 |
| 27 | 7  | Imiglucerase                                | **            | Salmeterol/Fluticasone  | \$ 451,759    | Perindopril            | \$ 1,486,857 |

|    |    |                       |                |                                  |                |                           |               |
|----|----|-----------------------|----------------|----------------------------------|----------------|---------------------------|---------------|
|    | 8  | Dimethyl fumarate     | \$ 929,877     | Clozapine                        | \$ 402,894     | Metoprolol                | \$ 1,317,710  |
| 1  | 9  | Etanercept            | \$ 905,340     | Paliperidone                     | \$ 382,815     | Salmeterol/Fluticasone    | \$ 1,315,805  |
| 2  | 10 | Interferon beta-1a    | \$ 769,915     | Morphine                         | \$ 369,167     | Omeprazole                | \$ 1,202,767  |
| 3  | 1  | Infliximab            | \$ 8,510,238   | Adalimumab                       | \$ 1,508,474   | Rosuvastatin              | \$ 3,274,532  |
| 4  | 2  | Adalimumab            | \$ 6,151,155   | Insulin glargine                 | \$ 1,044,312   | Atorvastatin              | \$ 2,941,950  |
| 5  | 3  | Lenalidomide          | \$ 4,728,894   | Hydromorphone                    | \$ 1,004,208   | Perindopril               | \$ 2,782,994  |
| 6  | 4  | Etanercept            | \$ 3,856,445   | Insulin (human)                  | \$ 979,550     | Rabeprazole               | \$ 2,433,663  |
| 7  | 5  | Ivacaftor             | \$ 1,718,320   | Salmeterol/Fluticasone           | \$ 919,444     | Levothyroxine sodium      | \$ 2,140,084  |
| 8  | 6  | Golimumab             | \$ 1,241,652   | Dalteparin                       | \$ 753,367     | Nifedipine                | \$ 2,110,545  |
| 9  | 7  | Ustekinumab           | \$ 1,074,379   | Etanercept                       | \$ 724,671     | Salmeterol/Fluticasone    | \$ 2,105,252  |
| 10 | 8  | Sofosbuvir/Ledipasvir | \$ 986,105     | Insulin detemir                  | \$ 635,095     | Insulin (human)           | \$ 1,974,249  |
| 11 | 9  | Octreotide            | \$ 976,124     | Insulin aspart                   | \$ 633,899     | Amlodipine                | \$ 1,876,032  |
| 12 | 10 | Abatacept             | \$ 833,096     | Infliximab                       | \$ 615,735     | Omeprazole                | \$ 1,806,201  |
| 13 | 1  | Sofosbuvir/Ledipasvir | \$ 148,382,350 | Ranibizumab                      | \$ 127,278,505 | Metformin and sitagliptin | \$ 79,071,410 |
| 14 | 2  | Infliximab            | \$ 102,676,705 | Aflibercept                      | \$ 112,664,676 | Atorvastatin              | \$ 72,434,758 |
| 15 | 3  | Lenalidomide          | \$ 96,914,294  | Paliperidone                     | \$ 37,426,387  | Sitagliptin               | \$ 70,017,206 |
| 16 | 4  | Ranibizumab           | \$ 66,839,510  | Insulin glargine                 | \$ 25,713,848  | Salmeterol/Fluticasone    | \$ 69,070,354 |
| 17 | 5  | Aflibercept           | \$ 56,911,069  | Hydromorphone                    | \$ 22,882,175  | Perindopril               | \$ 65,554,954 |
| 18 | 6  | Adalimumab            | \$ 50,579,837  | Aripiprazole                     | \$ 20,789,393  | Apixaban                  | \$ 59,605,420 |
| 19 | 7  | Etanercept            | \$ 43,524,508  | Adalimumab                       | \$ 19,488,982  | Rosuvastatin              | \$ 59,534,671 |
| 20 | 8  | Sofosbuvir            | \$ 43,520,384  | Lamivudine/Abacavir/Dolutegravir | \$ 18,886,292  | Rivaroxaban               | \$ 53,077,762 |
| 21 | 9  | Eculizumab            | \$ 31,107,836  | Tenofovir                        | \$ 17,137,188  | Insulin glargine          | \$ 50,378,061 |
| 22 | 10 | Octreotide            | \$ 23,355,851  | Risperidone                      | \$ 15,792,857  | Methadone                 | \$ 49,284,275 |
| 23 | 1  | Infliximab            | \$ 1,471,212   | Methadone                        | \$ 642,682     | Pantoprazole              | \$ 552,717    |
| 24 | 2  | Adalimumab            | \$ 1,440,688   | Insulin (human)                  | \$ 159,751     | Methadone                 | \$ 464,136    |
| 25 | 3  | Lenalidomide          | \$ 814,157     | Pantoprazole                     | \$ 141,566     | Atorvastatin              | \$ 364,888    |
| 26 | 4  | Etanercept            | \$ 449,238     | Salmeterol/Fluticasone           | \$ 124,469     | Rosuvastatin              | \$ 335,442    |
| 27 | 5  | Pirfenidone           | \$ 287,202     | Clozapine                        | \$ 123,870     | Perindopril               | \$ 301,234    |
| 28 | 6  | Aflibercept           | \$ 262,070     | Adalimumab                       | \$ 122,548     | Amlodipine                | \$ 264,573    |
| 29 | 7  | Risperidone           | \$ 237,664     | Insulin lispro                   | \$ 111,587     | Insulin (human)           | \$ 230,631    |

Nova Scotia

Ontario

PEI

Insulin lispro

Review Only

1  
2  
3  
4  
5  
6  
7  
8  
9  
10  
11  
12  
13  
14  
15  
16  
17  
18  
19  
20  
21  
22  
23  
24  
25  
26  
27  
28  
29  
30  
31  
32  
33  
34  
35  
36  
37  
38  
39  
40  
41  
42  
43  
44  
45  
46  
47

|              |    |                                             |               |                  |              |                        |              |
|--------------|----|---------------------------------------------|---------------|------------------|--------------|------------------------|--------------|
|              | 8  | Golimumab                                   | \$ 226,509    | Olanzapine       | \$ 111,147   | Fluticasone            | \$ 213,218   |
|              | 9  | Interferon beta-1a                          | \$ 222,685    | Fluticasone      | \$ 107,413   | Omeprazole             | \$ 209,668   |
|              | 10 | Fingolimod                                  | \$ 219,460    | Hydromorphone    | \$ 101,677   | Nifedipine             | \$ 194,951   |
| Saskatchewan | 1  | Infliximab                                  | \$ 29,224,199 | Adalimumab       | \$ 4,341,960 | Methylphenidate        | \$ 4,134,652 |
|              | 2  | Adalimumab                                  | \$ 13,904,222 | Etanercept       | \$ 3,251,959 | Insulin glargine       | \$ 3,565,614 |
|              | 3  | Sofosbuvir/Ledipasvir                       | \$ 8,070,050  | Hydromorphone    | \$ 3,076,061 | Salmeterol/Fluticasone | \$ 2,986,275 |
|              | 4  | Etanercept                                  | \$ 5,352,192  | Insulin glargine | \$ 2,716,952 | Perindopril            | \$ 2,953,658 |
|              | 5  | Dimethyl fumarate                           | \$ 3,687,514  | Infliximab       | \$ 2,669,912 | Hydromorphone          | \$ 2,707,466 |
|              | 6  | Sofosbuvir                                  | \$ 2,467,151  | Glatiramer       | \$ 2,542,614 | Rivaroxaban            | \$ 2,616,595 |
|              | 7  | Interferon beta-1a                          | \$ 1,955,792  | Paliperidone     | \$ 2,215,723 | Nifedipine             | \$ 2,484,144 |
|              | 8  | Ustekinumab                                 | \$ 1,840,246  | Clozapine        | \$ 1,966,654 | Atorvastatin           | \$ 2,428,239 |
|              | 9  | Golimumab                                   | \$ 1,839,197  | Golimumab        | \$ 1,900,253 | Rosuvastatin           | \$ 2,036,727 |
|              | 10 | Dasabuvir/Ombitasvir/Paritaprevir/Ritonavir | \$ 1,012,192  | Erythropoietin   | \$ 1,662,673 | Tiotropium             | \$ 2,032,495 |

Confidential

**Table 2: Top 10 chemicals by rate of use, by high cost category and by jurisdiction, fiscal year 2016**

Note: Biologics (not including insulin or LMWH) highlighted in Blue. Antivirals are highlighted in Yellow.

| Jurisdiction | Rank | Very high drug-cost Beneficiaries (Top 1%) |                     | High drug-cost Beneficiaries (Top 5%) |                     | Other beneficiaries |                     |
|--------------|------|--------------------------------------------|---------------------|---------------------------------------|---------------------|---------------------|---------------------|
|              |      | Drug Name                                  | Number of Users (n) | Drug Name                             | Number of Users (n) | Drug Name           | Number of Users (n) |
| Alberta      | 1    | Infliximab                                 | 1,785               | Rosuvastatin                          | 101,728             | Levothyroxine       | 115,386             |
|              | 2    | Pantoprazole                               | 1,206               | Atorvastatin                          | 96,282              | Pantoprazole        | 114,298             |
|              | 3    | Methotrexate                               | 1,137               | Metformin                             | 78,404              | Rosuvastatin        | 101,728             |
|              | 4    | Adalimumab                                 | 1,118               | Amlodipine                            | 76,953              | Atorvastatin        | 96,282              |
|              | 5    | Folic acid                                 | 948                 | Amoxicillin                           | 70,730              | Metformin           | 78,404              |
|              | 6    | Codeine/APAP                               | 858                 | Zopiclone                             | 70,544              | Amlodipine          | 76,953              |
|              | 7    | Zopiclone                                  | 820                 | Diclofenac                            | 68,515              | Amoxicillin         | 70,730              |
|              | 8    | Prednisone                                 | 782                 | Codeine /APAP                         | 67,620              | Zopiclone           | 70,544              |
|              | 9    | Levothyroxine                              | 733                 | Rosuvastatin                          | 101,728             | Diclofenac          | 68,515              |
|              | 10   | Amoxicillin                                | 729                 | Atorvastatin                          | 96,282              | Codeine /APAP       | 67,620              |
| BC           | 1    | Infliximab                                 | 2,323               | Salbutamol                            | 6,186               | Levothyroxine       | 87,178              |
|              | 2    | Codeine /APAP                              | 1,287               | Codeine /APAP                         | 5,561               | Ramipril            | 86,533              |
|              | 3    | Sofosbuvir /ledipasvir                     | 1,278               | Gabapentin                            | 5,465               | Atorvastatin        | 86,055              |
|              | 4    | Adalimumab                                 | 1,157               | Quetiapine                            | 5,159               | Codeine /APAP       | 83,408              |
|              | 5    | Salbutamol                                 | 1,126               | Lorazepam                             | 4,744               | Amoxicillin         | 79,299              |

|    |    |                |       |                      |       |               |        |
|----|----|----------------|-------|----------------------|-------|---------------|--------|
| 1  | 6  | Prednisone     | 1,065 | Atorvastatin         | 4,215 | Salbutamol    | 78,086 |
| 2  | 7  | Methotrexate   | 876   | Metformin            | 4,073 | Metformin     | 74,771 |
| 3  | 8  | Amoxicillin    | 868   | Pantoprazole         | 4,023 | Nicotine      | 70,813 |
| 4  | 9  | Lorazepam      | 759   | Levothyroxine        | 4,013 | Rosuvastatin  | 66,972 |
| 5  | 10 | Gabapentin     | 751   | Ramipril             | 4,008 | Amlodipine    | 64,547 |
| 6  |    |                |       |                      |       |               |        |
| 7  | 1  | Infliximab     | 506   | Codeine /APAP        | 1,218 | Salbutamol    | 21,055 |
| 8  | 2  | Codeine /APAP  | 309   | Salbutamol           | 1,170 | Amoxicillin   | 19,180 |
| 9  | 3  | Hydrocortisone | 258   | Levothyroxine sodium | 888   | Codeine /APAP | 18,777 |
| 10 | 4  | Zopiclone      | 213   | Gabapentin           | 881   | Levothyroxine | 18,628 |
| 11 | 5  | Salbutamol     | 207   | Zopiclone            | 852   | Atorvastatin  | 17,679 |
| 12 | 6  | Prednisone     | 203   | Prednisone           | 811   | Metformin     | 17,020 |
| 13 | 7  | Adalimumab     | 188   | Metformin            | 810   | Metoprolol    | 15,737 |
| 14 | 8  | Amoxicillin    | 185   | Atorvastatin         | 779   | Furosemide    | 14,472 |
| 15 | 9  | Omeprazole     | 176   | Omeprazole           | 768   | APAP          | 13,787 |
| 16 | 10 | Azithromycin   | 168   | Adalimumab           | 748   | Omeprazole    | 13,199 |
| 17 |    |                |       |                      |       |               |        |
| 18 | 1  | Pantoprazole   | 433   | Pantoprazole         | 1,968 | Pantoprazole  | 33,131 |
| 19 | 2  | Salbutamol     | 290   | Salbutamol           | 1,637 | Rosuvastatin  | 23,935 |
| 20 | 3  | Zopiclone      | 284   | Zopiclone            | 1,309 | Salbutamol    | 23,158 |
| 21 | 4  | Infliximab     | 239   | Lorazepam            | 986   | Levothyroxine | 21,228 |
| 22 | 5  | Gabapentin     | 206   | Rosuvastatin         | 973   | Atorvastatin  | 17,287 |
| 23 | 6  | Prednisone     | 206   | Furosemide           | 936   | Metformin     | 16,745 |

Manitoba

New Brunswick

|    |             |    |               |     |                 |       |                      |        |
|----|-------------|----|---------------|-----|-----------------|-------|----------------------|--------|
| 1  |             | 7  | Lorazepam     | 198 | Metformin       | 934   | Zopiclone            | 16,123 |
| 2  |             | 8  | Rosuvastatin  | 192 | Prednisone      | 909   | Lorazepam            | 15,156 |
| 3  |             | 9  | Adalimumab    | 175 | Levothyroxine   | 897   | Amoxicillin          | 13,746 |
| 4  |             | 10 | Levothyroxine | 154 | Gabapentin      | 880   | Metoprolol           | 12,101 |
| 5  |             |    |               |     |                 |       |                      |        |
| 6  |             |    |               |     |                 |       |                      |        |
| 7  |             | 1  | Rabeprazole   | 306 | Salbutamol      | 1,583 | Amoxicillin          | 21,174 |
| 8  |             | 2  | Salbutamol    | 236 | Rabeprazole     | 1,562 | Rosuvastatin         | 20,799 |
| 9  |             | 3  | Prednisone    | 229 | Rosuvastatin    | 1,155 | Rabeprazole          | 20,394 |
| 10 |             | 4  | Zopiclone     | 195 | Zopiclone       | 1,146 | Salbutamol           | 19,368 |
| 11 |             | 5  | Adalimumab    | 184 | Insulin (human) | 1,117 | Metoprolol           | 14,493 |
| 12 |             | 6  | Rosuvastatin  | 180 | Furosemide      | 1,034 | Metformin            | 13,366 |
| 13 |             | 7  | Amoxicillin   | 178 | Amoxicillin     | 973   | Lorazepam            | 12,418 |
| 14 |             | 8  | Lorazepam     | 164 | Metformin       | 967   | Atorvastatin         | 11,368 |
| 15 |             | 9  | Ciprofloxacin | 161 | Lorazepam       | 956   | Hydrochlorothiazide  | 11,139 |
| 16 |             | 10 | Infliximab    | 157 | Insulin (human) | 929   | Levothyroxine sodium | 11,026 |
| 17 |             |    |               |     |                 |       |                      |        |
| 18 |             | 1  | Adalimumab    | 326 | Salbutamol      | 2,132 | Rosuvastatin         | 30,964 |
| 19 |             | 2  | Infliximab    | 309 | Furosemide      | 1,946 | Levothyroxine        | 28,840 |
| 20 |             | 3  | Rabeprazole   | 284 | Rabeprazole     | 1,680 | Rabeprazole          | 23,155 |
| 21 |             | 4  | Methotrexate  | 262 | Metformin       | 1,669 | Atorvastatin         | 21,004 |
| 22 |             | 5  | Levothyroxine | 229 | Rosuvastatin    | 1,629 | Metoprolol           | 20,097 |
| 23 |             | 6  | Salbutamol    | 222 | Levothyroxine   | 1,625 | Salbutamol           | 19,520 |
| 24 |             | 7  | Prednisone    | 219 | Metoprolol      | 1,390 | Metformin            | 19,248 |
| 25 |             |    |               |     |                 |       |                      |        |
| 26 | Newfoundla  |    |               |     |                 |       |                      |        |
| 27 | nd          |    |               |     |                 |       |                      |        |
| 28 |             |    |               |     |                 |       |                      |        |
| 29 |             |    |               |     |                 |       |                      |        |
| 30 |             |    |               |     |                 |       |                      |        |
| 31 |             |    |               |     |                 |       |                      |        |
| 32 |             |    |               |     |                 |       |                      |        |
| 33 |             |    |               |     |                 |       |                      |        |
| 34 |             |    |               |     |                 |       |                      |        |
| 35 |             |    |               |     |                 |       |                      |        |
| 36 |             |    |               |     |                 |       |                      |        |
| 37 |             |    |               |     |                 |       |                      |        |
| 38 |             |    |               |     |                 |       |                      |        |
| 39 |             |    |               |     |                 |       |                      |        |
| 40 |             |    |               |     |                 |       |                      |        |
| 41 | Nova Scotia |    |               |     |                 |       |                      |        |
| 42 |             |    |               |     |                 |       |                      |        |
| 43 |             |    |               |     |                 |       |                      |        |
| 44 |             |    |               |     |                 |       |                      |        |
| 45 |             |    |               |     |                 |       |                      |        |
| 46 |             |    |               |     |                 |       |                      |        |
| 47 |             |    |               |     |                 |       |                      |        |

|    |    |               |       |                 |        |                     |         |
|----|----|---------------|-------|-----------------|--------|---------------------|---------|
| 1  | 8  | Rosuvastatin  | 217   | Insulin (human) | 1,345  | Hydrochlorothiazide | 17,138  |
| 2  | 9  | Etanercept    | 197   | Prednisone      | 1,321  | Amlodipine          | 16,569  |
| 3  | 10 | Folic acid    | 179   | Atorvastatin    | 1,287  | Amoxicillin         | 14,762  |
| 4  |    |               |       |                 |        |                     |         |
| 5  | 1  | Pantoprazole  | 7,083 | Pantoprazole    | 37,252 | Rosuvastatin        | 604,402 |
| 6  | 2  | Salbutamol    | 5,977 | Salbutamol      | 33,686 | Atorvastatin        | 506,390 |
| 7  | 3  | Rosuvastatin  | 5,464 | Rosuvastatin    | 30,160 | Pantoprazole        | 486,193 |
| 8  | 4  | Amoxicillin   | 4,608 | Atorvastatin    | 28,181 | Amoxicillin         | 457,544 |
| 9  | 5  | Amlodipine    | 4,575 | Metformin       | 27,005 | Amlodipine          | 422,938 |
| 10 | 6  | Atorvastatin  | 4,458 | Furosemide      | 25,900 | Salbutamol          | 402,057 |
| 11 | 7  | Codeine /APAP | 4,107 | Amlodipine      | 25,040 | Levothyroxine       | 391,981 |
| 12 | 8  | Prednisone    | 4,057 | Levothyroxine   | 21,504 | Metformin           | 348,436 |
| 13 | 9  | Levothyroxine | 3,843 | Amoxicillin     | 21,316 | Codeine /APAP       | 323,008 |
| 14 | 10 | Metformin     | 3,756 | Hydromorphone   | 20,883 | Ramipril            | 273,744 |
| 15 |    |               |       |                 |        |                     |         |
| 16 | 1  | Pantoprazole  | 96    | Pantoprazole    | 585    | Rosuvastatin        | 6,369   |
| 17 | 2  | Adalimumab    | 90    | Salbutamol      | 573    | Levothyroxine       | 6,008   |
| 18 | 3  | Salbutamol    | 89    | Levothyroxine   | 382    | Metformin           | 6,001   |
| 19 | 4  | Prednisone    | 56    | Metformin       | 353    | Pantoprazole        | 5,791   |
| 20 | 5  | Infliximab    | 55    | Furosemide      | 346    | Amoxicillin         | 5,498   |
| 21 | 6  | Levothyroxine | 52    | Rosuvastatin    | 326    | Amlodipine          | 4,487   |
| 22 | 7  | Amoxicillin   | 50    | Amoxicillin     | 322    | Atorvastatin        | 4,442   |
| 23 | 8  | Metformin     | 49    | Ipratropium     | 309    | Ramipril            | 4,010   |
| 24 |    |               |       |                 |        |                     |         |
| 25 |    |               |       |                 |        |                     |         |
| 26 |    |               |       |                 |        |                     |         |
| 27 |    |               |       |                 |        |                     |         |
| 28 |    |               |       |                 |        |                     |         |
| 29 |    |               |       |                 |        |                     |         |
| 30 |    |               |       |                 |        |                     |         |
| 31 |    |               |       |                 |        |                     |         |
| 32 |    |               |       |                 |        |                     |         |
| 33 |    |               |       |                 |        |                     |         |
| 34 |    |               |       |                 |        |                     |         |
| 35 |    |               |       |                 |        |                     |         |
| 36 |    |               |       |                 |        |                     |         |
| 37 |    |               |       |                 |        |                     |         |
| 38 |    |               |       |                 |        |                     |         |
| 39 |    |               |       |                 |        |                     |         |
| 40 |    |               |       |                 |        |                     |         |

|    |             |               |     |                  |       |               |        |
|----|-------------|---------------|-----|------------------|-------|---------------|--------|
| 1  | 9           | Cefalexin     | 49  | Insulin (human)  | 305   | Salbutamol    | 3,869  |
| 2  | 10          | Rosuvastatin  | 47  | Prednisone       | 287   | Metoprolol    | 3,783  |
| 3  | 1           | Infliximab    | 866 | Furosemide       | 2,942 | Amoxicillin   | 41,488 |
| 4  | 2           | Folic acid    | 550 | Salbutamol       | 2,838 | Rosuvastatin  | 28,126 |
| 5  | 3           | Adalimumab    | 537 | Metformin        | 2,742 | Cefalexin     | 26,300 |
| 6  | 4           | Prednisone    | 506 | Pantoprazole     | 2,639 | Atorvastatin  | 24,905 |
| 7  | 5           | Methotrexate  | 476 | Insulin glargine | 2,508 | Levothyroxine | 24,380 |
| 8  | 6           | Pantoprazole  | 443 | Hydromorphone    | 2,308 | Metformin     | 24,343 |
| 9  | 7           | Salbutamol    | 409 | Prednisone       | 2,233 | Salbutamol    | 23,633 |
| 10 | 8           | Amoxicillin   | 401 | Levothyroxine    | 2,089 | Pantoprazole  | 22,440 |
| 11 | 9           | Hydromorphone | 378 | Rosuvastatin     | 2,036 | Azithromycin  | 20,390 |
| 12 | 10          | Cefalexin     | 365 | Atorvastatin     | 1,991 | Amlodipine    | 19,481 |
| 13 |             |               |     |                  |       |               |        |
| 14 |             |               |     |                  |       |               |        |
| 15 |             |               |     |                  |       |               |        |
| 16 |             |               |     |                  |       |               |        |
| 17 |             |               |     |                  |       |               |        |
| 18 |             |               |     |                  |       |               |        |
| 19 |             |               |     |                  |       |               |        |
| 20 |             |               |     |                  |       |               |        |
| 21 | Saskatchewa |               |     |                  |       |               |        |
| 22 | n           |               |     |                  |       |               |        |
| 23 |             |               |     |                  |       |               |        |
| 24 |             |               |     |                  |       |               |        |
| 25 |             |               |     |                  |       |               |        |
| 26 |             |               |     |                  |       |               |        |
| 27 |             |               |     |                  |       |               |        |
| 28 |             |               |     |                  |       |               |        |
| 29 |             |               |     |                  |       |               |        |
| 30 |             |               |     |                  |       |               |        |
| 31 |             |               |     |                  |       |               |        |
| 32 |             |               |     |                  |       |               |        |
| 33 |             |               |     |                  |       |               |        |
| 34 |             |               |     |                  |       |               |        |
| 35 |             |               |     |                  |       |               |        |
| 36 |             |               |     |                  |       |               |        |
| 37 |             |               |     |                  |       |               |        |
| 38 |             |               |     |                  |       |               |        |
| 39 |             |               |     |                  |       |               |        |
| 40 |             |               |     |                  |       |               |        |
| 41 |             |               |     |                  |       |               |        |
| 42 |             |               |     |                  |       |               |        |
| 43 |             |               |     |                  |       |               |        |
| 44 |             |               |     |                  |       |               |        |
| 45 |             |               |     |                  |       |               |        |
| 46 |             |               |     |                  |       |               |        |
| 47 |             |               |     |                  |       |               |        |

1  
2  
3  
4  
5  
6  
7  
8  
9  
10  
11  
12  
13  
14  
15  
16  
17  
18  
19  
20  
21  
22  
23  
24  
25  
26  
27  
28  
29  
30  
31  
32  
33  
34  
35  
36  
37  
38  
39  
40  
41  
42  
43  
44  
45  
46  
47

**Table 3: Proportion of total program spending (TPS) and total program spending by high drug-cost beneficiaries group including Cancer, fiscal year 2016**

| Jurisdiction | Top 1%                 |                   | Top 5%                 |                   | Top 10%                |                   | Overall                |
|--------------|------------------------|-------------------|------------------------|-------------------|------------------------|-------------------|------------------------|
|              | Total Program Spending | Proportion of TPS | Total Program Spending | Proportion of TPS | Total Program Spending | Proportion of TPS | Total Program Spending |
|              | (\$ Million)           | (%)               | (\$ Million)           | (%)               | (\$ Million)           | (%)               | (\$ Million)           |
| BC           | \$ 297.8               | 27.4              | \$ 586.6               | 54.0              | \$ 731.9               | 67.3              | \$ 1,087.2             |
| AB           | \$ 189.3               | 24.5              | \$ 363.5               | 47.0              | \$ 450.7               | 58.3              | \$ 773.3               |
| SK           | \$ 89.7                | 28.3              | \$ 175.5               | 55.4              | \$ 218.0               | 68.8              | \$ 316.7               |
| MB           | \$ 85.5                | 26.6              | \$ 174.7               | 54.5              | \$ 215.3               | 67.1              | \$ 320.8               |
| ON           | \$ 1,107.5             | 21.6              | \$ 2,242.6             | 43.7              | \$ 2,915.8             | 56.9              | \$ 5,126.3             |
| NB           | \$ 44.2                | 21.0              | \$ 93.5                | 44.3              | \$ 119.7               | 56.8              | \$ 210.9               |
| PE           | \$ 7.6                 | 29.2              | \$ 13.7                | 52.6              | \$ 17.2                | 65.9              | \$ 26.0                |
| NS           | \$ 42.2                | 22.6              | \$ 76.3                | 40.8              | \$ 99.1                | 53.0              | \$ 187.0               |
| NL           | \$ 29.1                | 21.3              | \$ 56.0                | 41.0              | \$ 74.1                | 54.2              | \$ 136.8               |

**Table 4: Drug utilization among the top 1% of beneficiaries group, fiscal year 2016**

| Jurisdiction              | Top 1%                          |                                                   |                               |
|---------------------------|---------------------------------|---------------------------------------------------|-------------------------------|
|                           | Number of drugs<br>Median (IQR) | Beneficiaries with claim over<br>\$1,000<br>N (%) | Beneficiaries aged 65+<br>(%) |
| <b>Overall</b>            | <b>8 (4-13)</b>                 | <b>94.7%</b>                                      | <b>36.9%</b>                  |
| British Columbia          | 6 (3-10)                        | 97.6%                                             | 18.9%                         |
| Alberta                   | 7 (3-11)                        | 99.5%                                             | 32.5%                         |
| Saskatchewan              | 7 (4-11)                        | 94.9%                                             | 20.8%                         |
| Manitoba                  | 7 (4-12)                        | 95.9%                                             | 21.6%                         |
| Ontario                   | 10 (5-15)                       | 93.0%                                             | 46.6%                         |
| New Brunswick             | 9 (5-13)                        | 91.6%                                             | 33.4%                         |
| Prince Edward island      | 6 (2-12)                        | 73.5%                                             | 31.6%                         |
| Nova Scotia               | 8 (4-13)                        | 97.6%                                             | 52.7%                         |
| Newfoundland and Labrador | 10 (6-15)                       | 92.3%                                             | 25.8%                         |

**IQR: Interquartile range**
